# Supplementary material for: Effect of water on the transport properties of protic and aprotic imidazolium ionic liquids – an analysis of self-diffusivity, conductivity, and proton exchange mechanism
Source: Royal Society of Chemistry journal article supplement (doi:10.1039/c4cp00527a), 2014-01-01
Supplement: c4cp00527a2.pdf [file c4cp00527a2.pdf]

# Effect of water on the transport properties in protic and aprotic imidazolium ionic liquids. An analysis of self-diffusivity, conductivity, and proton exchange mechanism

N.Yaghini, L.Nordstierna, A.Martinelli

## 1 Supplementary Information

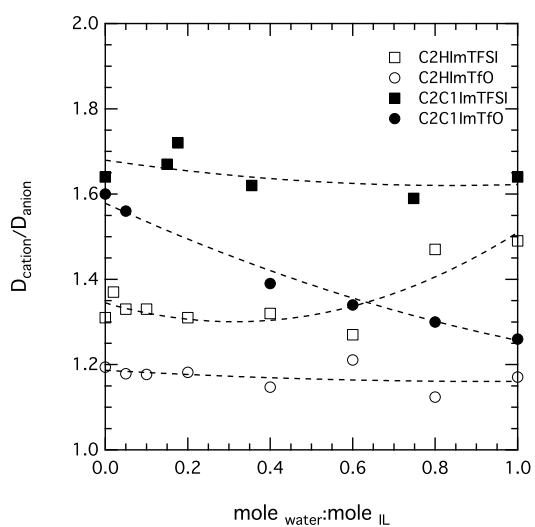

Figure 1: SI-1. Relative self-diffusion coefficient  $D_{cation}/D_{anion}$  as a function of added water for the ionic liquids investigated.

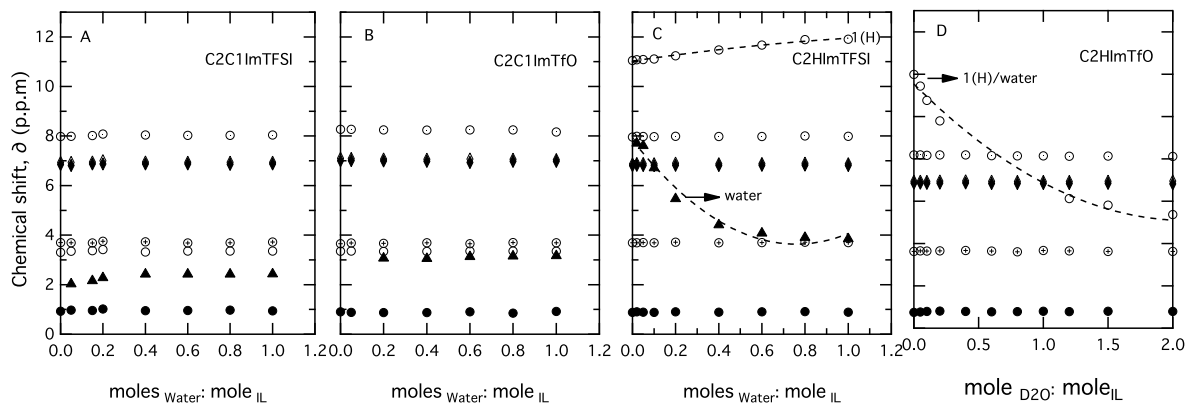

Figure 2: SI-2. Chemical shift map from  $^1\text{H}$  NMR experiments for investigated ionic liquids at different  $\text{H}_2\text{O}$ -to-IL mole ratios. 1(Me) and 1(H)(○), 2(⊙), 3 (◇), 4(◆), 5(⊕), 6 (●), water(▲).
